# Supplementary material for: The bioinspired construction of an ordered carbon nitride array for photocatalytic mediated enzymatic reduction
Source: Royal Society of Chemistry journal article supplement (doi:10.1039/c4cp01348d), 2014-01-01
Supplement: c4cp01348d1.pdf [file c4cp01348d1.pdf]

## Supporting Information

# Bioinspired construction of ordered carbon nitride array for photocatalytic mediated enzymatic reductions

**Jian Liu<sup>1\*</sup>, Rémi Cazelles<sup>2</sup>, Zu Peng Chen<sup>1</sup>, Han Zhou<sup>1</sup>, Anne Galarneau<sup>2</sup>, and Markus Antonietti<sup>1</sup>**

<sup>1</sup>Department of Colloid Chemistry, Max Planck Institute of Colloids and Interfaces, 14424 Potsdam, Germany; <sup>2</sup>Institut Charles Gerhardt Montpellier, UMR 5253 CNRS/UM2/ENSCM/UM1, ENSCM, 8 rue de l'Ecole Normale, 34296 Montpellier Cedex 5, France

E-Mail: [Jian.Liu@mpikg.mpg.de](mailto:Jian.Liu@mpikg.mpg.de)

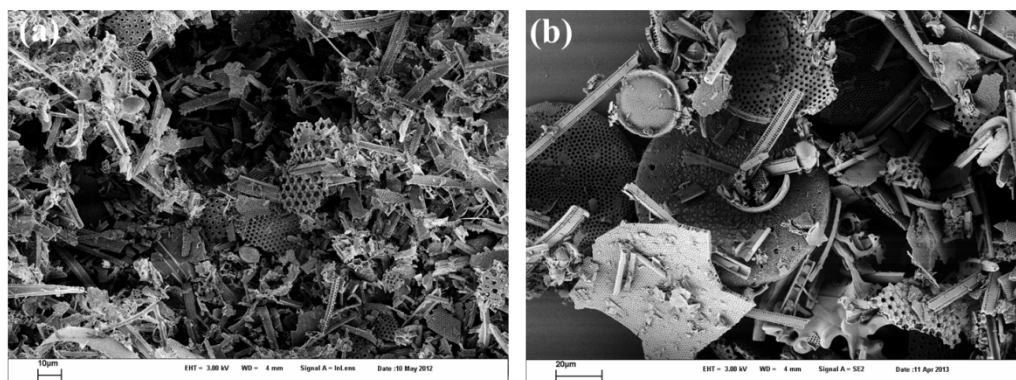

**Figure S1.** SEM images of pristine diatom template (a) and purified diatom template (b).

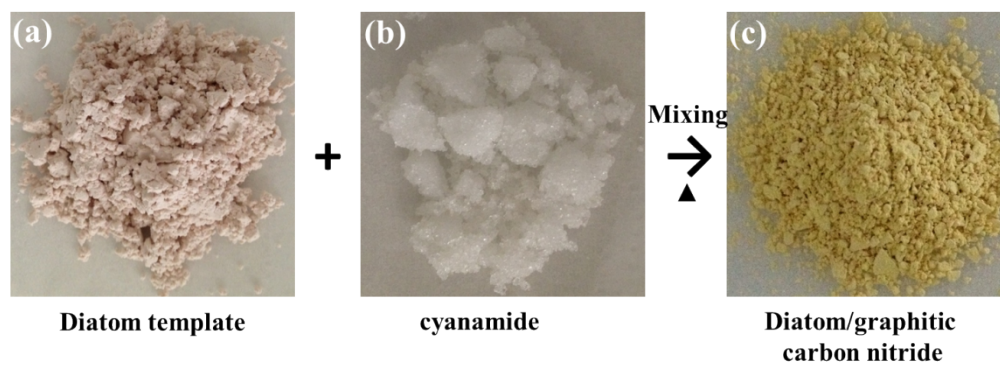

**Figure S2.** Illustration of solid phase mixing diatom (a) and cyanamide (b) to synthesize diatom templated carbon nitride.

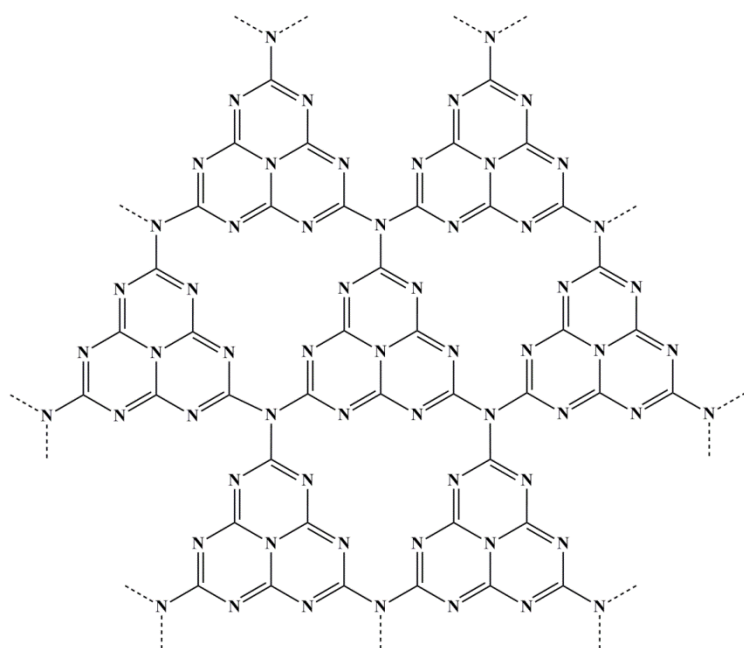

**Figure S3.** Schematic diagram of a perfect carbon nitride sheet constructed from tri-s-triazine building blocks.

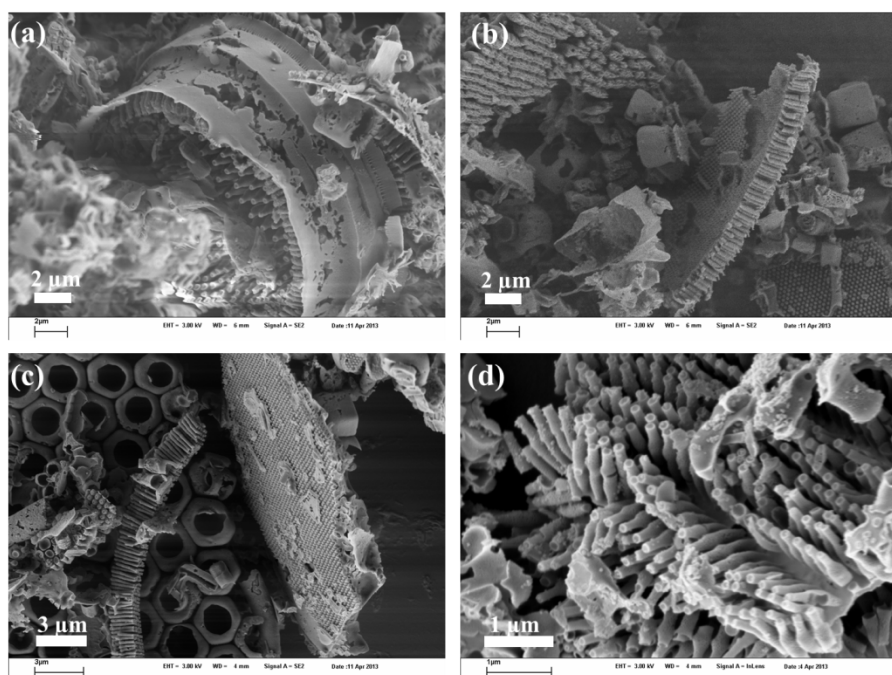

Figure S4. SEM images of CNA.

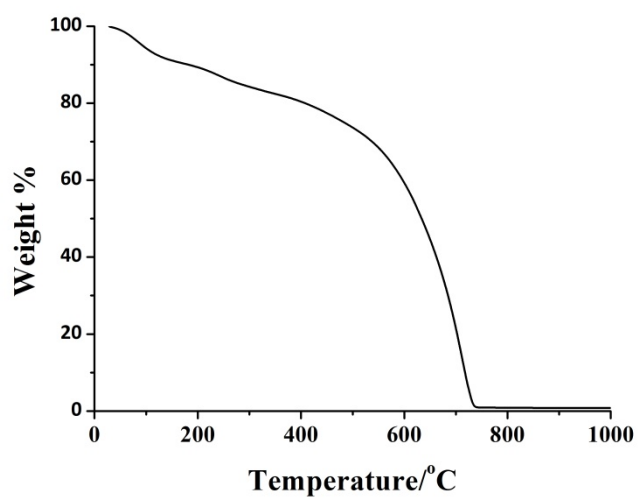

Figure S5. TGA curve of CNA.

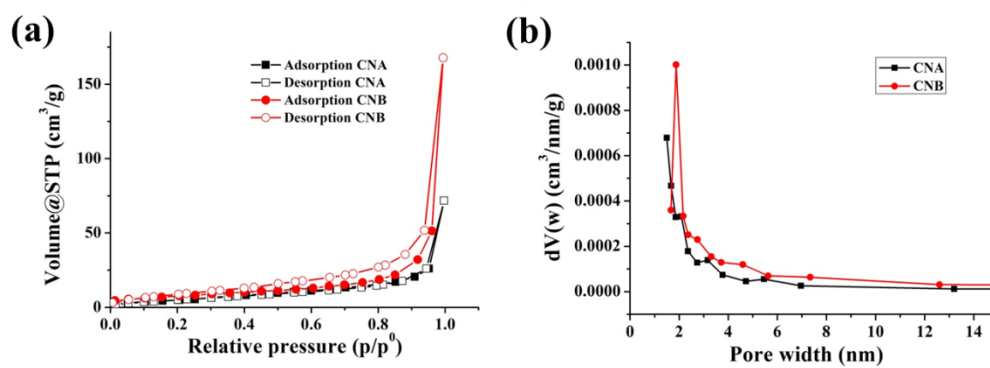

Figure S6. N<sub>2</sub> sorption isotherms of CAN and CNB (a) and corresponding pore size distributions (b), respectively.

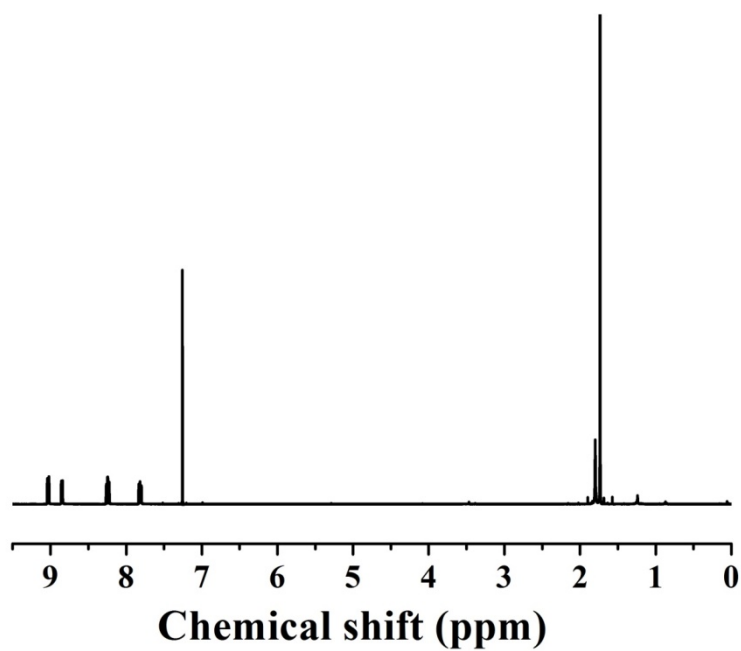

**Figure S7.** NMR of  $[\text{Cp}^*\text{Rh}(\text{bpy})\text{Cl}]\text{Cl}$  compound.  $^1\text{H}$  NMR (300 MHz,  $\text{CDCl}_3$ ):  $\text{Cp}^*[\text{Rh}(2,2'\text{-bpy})]$   $\delta(\text{ppm}) = 9.02$  (d, 2H, H-3, 3'), 8.84 (d, 2H, H-6, 6'), 8.24 (t, 2H, H-5, 5'), 7.81 (t, 2H, H-4, 4'), 1.74 (s, 15H,  $\text{Cp}^*$ )

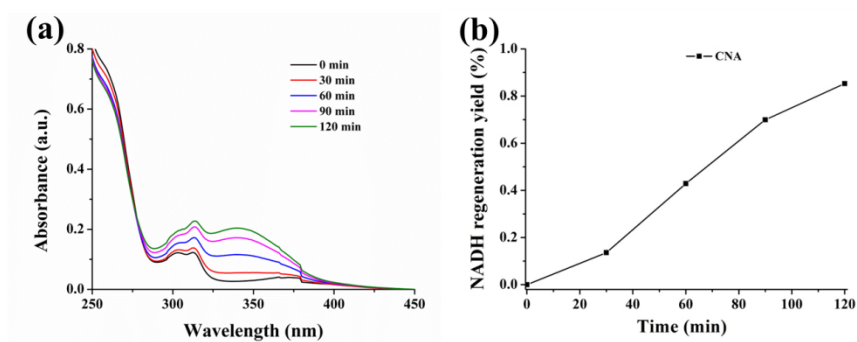

**Figure S8.** (a) Spectral measurement of NADH concentration in mediator involved reaction solution; (b) Photocatalytic NADH regeneration kinetics in the presence of mediator by CNA.

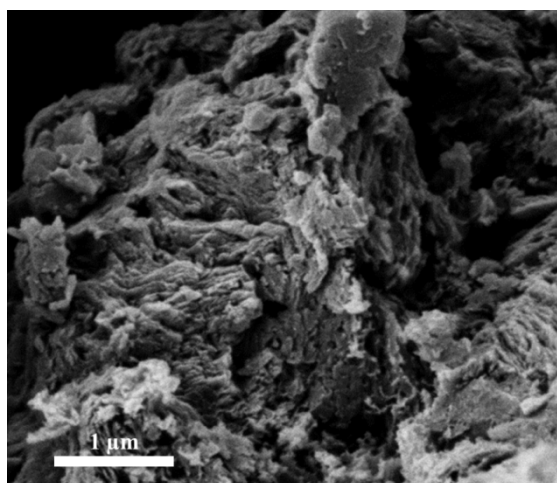

**Figure S9.** SEM of bulky CNB.
